# Supplementary material
Source: PubMed Central journal article supplement (PMC5035187)
Supplement: NIHMS788279-supplement-Supplement.pdf [file NIHMS788279-supplement-Supplement.pdf]

## Supplementary Material

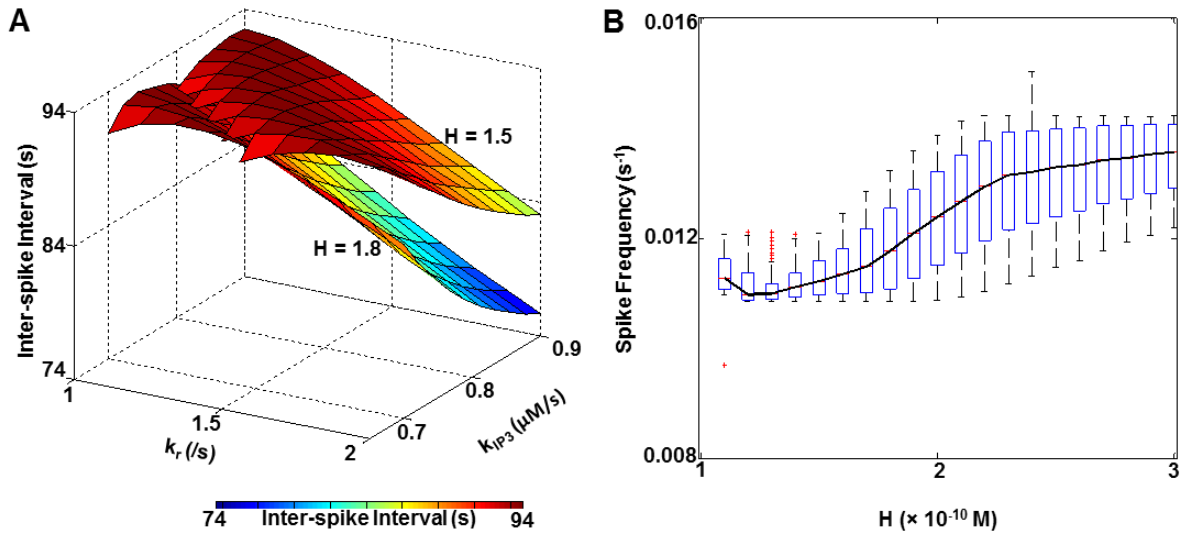

**Figure S1:** (A) Variation in inter-spike interval of a single hepatocyte with model parameters. Increase in  $H$  from  $1.5 \times 10^{-10}$  M to  $1.8 \times 10^{-10}$  M results in a decrease in inter-spike interval illustrating frequency encoding as observed experimentally. Increase in  $k_r$  or  $k_{IP3}$  causes a decrease in inter-spike interval. All parameter values except  $k_r$ ,  $k_{IP3}$ , and  $H$  were fixed at the nominal values reported in Table S1.  $k_r$  was varied between 1 and 2/s,  $k_{IP3}$  was varied between 0.7 and 0.9  $\mu\text{M/s}$  while  $H$  took two values ( $1.5$  and  $1.8 \times 10^{-10}$  M); (B) Spike frequency ranges for hepatocytes with varying vasopressin concentrations. For each vasopressin concentration value, 100 hepatocytes were initialized with uniformly sampled  $k_r$  values ( $\in [1, 2]$ /s) and  $k_{IP3}$  values ( $\in [0.7, 0.9]$   $\mu\text{M/s}$ ), the remaining parameters fixed at their respective nominal values.

**Table S1:** Nominal parameter values

| <b>Parameter ID</b> | <b>Value</b>             |
|---------------------|--------------------------|
| $k_r$               | 1.5 /s                   |
| $k_d$               | 0.34 /s                  |
| $k_{Hr}$            | $1 / 10^{-10}$ M-s       |
| H                   | $1.8 \times 10^{-10}$ M  |
| $k_{IP3}$           | 0.8 $\mu$ M/s            |
| $k_{cat}$           | 0.45                     |
| $k_3$               | 1 $\mu$ M                |
| D                   | 1.6 /s                   |
| G                   | NA                       |
| A                   | 0.2 $\mu$ M/s            |
| $k_1$               | 0.5 $\mu$ M              |
| L                   | 0.00015 $\mu$ M/s        |
| B                   | 0.082 $\mu$ M/s          |
| $k_2$               | 0.15 $\mu$ M             |
| E                   | $1 / (\mu\text{M})^4$ -s |
| F                   | 0.01 /s                  |

**Table S2:** Initial intracellular species concentrations in model simulations. In every simulation, initial concentration of intracellular signaling species acquired the following values

| <b>Species ID</b> | <b>Value</b> |
|-------------------|--------------|
| $r_i$             | 0.5          |
| $IP3_i$           | 0.1 $\mu$ M  |
| $CaI_i$           | 0.2 $\mu$ M  |
| $CaT_i$           | 500 $\mu$ M  |
| $g_i$             | 0.25         |

**Table S3:** Parameter values used in **Figure 2; 2A:** All hepatocytes were initialized with parameter and initial values reported in Tables S1 and S2 respectively.  $G_{ij} = \{0, 0.9\}$  for all  $i,j$  pairs represent uncoupled and gap junction coupled hepatocytes; **2B:** Nominal values were used for all parameters *except*  $k_r$  and  $k_{IP3}$ . Values used for these parameters were:

|               | $k_r$    | $k_{IP3}$ |
|---------------|----------|-----------|
| Hepatocyte 1  | 1        | 0.785714  |
| Hepatocyte 2  | 1.5      | 0.885714  |
| Hepatocyte 3  | 1.928571 | 0.757143  |
| Hepatocyte 4  | 1.357143 | 0.857143  |
| Hepatocyte 5  | 1.857143 | 0.842857  |
| Hepatocyte 6  | 1.785714 | 0.814286  |
| Hepatocyte 7  | 1.571429 | 0.742857  |
| Hepatocyte 8  | 1.714286 | 0.828571  |
| Hepatocyte 9  | 1.142857 | 0.771429  |
| Hepatocyte 10 | 1.642857 | 0.728571  |
| Hepatocyte 11 | 1.428571 | 0.714286  |
| Hepatocyte 12 | 2        | 0.871429  |
| Hepatocyte 13 | 1.214286 | 0.9       |
| Hepatocyte 14 | 1.071429 | 0.7       |
| Hepatocyte 15 | 1.285714 | 0.8       |

$G_{ij} = \{0, 0.9\}$  for all  $i,j$  pairs.

**Table S4:** Parameters used to generate **Figure 3**. Only  $k_r$  (Figure 5A) or  $k_{IP3}$  (Figure 5B) values for each hepatocyte were varied, the other parameter fixed at its nominal value:

|                              | <b>Fig. 3A</b> | <b>Fig. 3B</b> |
|------------------------------|----------------|----------------|
| <b>Variable parameter ID</b> | $k_r$          | $k_{IP3}$      |
| Hepatocyte 1                 | 2              | 0.9            |
| Hepatocyte 2                 | 1.928571       | 0.885714       |
| Hepatocyte 3                 | 1.857143       | 0.871429       |
| Hepatocyte 4                 | 1.785714       | 0.857143       |
| Hepatocyte 5                 | 1.714286       | 0.842857       |
| Hepatocyte 6                 | 1.642857       | 0.828571       |
| Hepatocyte 7                 | 1.571429       | 0.814286       |
| Hepatocyte 8                 | 1.5            | 0.8            |
| Hepatocyte 9                 | 1.428571       | 0.785714       |
| Hepatocyte 10                | 1.357143       | 0.771429       |
| Hepatocyte 11                | 1.285714       | 0.757143       |
| Hepatocyte 12                | 1.214286       | 0.742857       |
| Hepatocyte 13                | 1.142857       | 0.728571       |
| Hepatocyte 14                | 1.071429       | 0.714286       |
| Hepatocyte 15                | 1              | 0.7            |

**Table S5:**  $k_{IP3}$  values used in **Figure 4** with other hepatocyte parameters at nominal values.  $k_r$  gradient was the same as that used in Figure 3A.

|               | <b>Figure 4A</b> | <b>Figure 4B</b> | <b>Figure 4C</b> | <b>Figure 4D</b> |
|---------------|------------------|------------------|------------------|------------------|
|               | $k_{IP3}$        | $k_{IP3}$        | $k_{IP3}$        | $k_{IP3}$        |
| Hepatocyte 1  | 0.9              | 0.8              | 0.7              | 0.728571         |
| Hepatocyte 2  | 0.885714         | 0.8              | 0.714286         | 0.714286         |
| Hepatocyte 3  | 0.871429         | 0.8              | 0.728571         | 0.828571         |
| Hepatocyte 4  | 0.857143         | 0.8              | 0.742857         | 0.857143         |
| Hepatocyte 5  | 0.842857         | 0.8              | 0.757143         | 0.771429         |
| Hepatocyte 6  | 0.828571         | 0.8              | 0.771429         | 0.7              |
| Hepatocyte 7  | 0.814286         | 0.8              | 0.785714         | 0.785714         |
| Hepatocyte 8  | 0.8              | 0.8              | 0.8              | 0.742857         |
| Hepatocyte 9  | 0.785714         | 0.8              | 0.814286         | 0.9              |
| Hepatocyte 10 | 0.771429         | 0.8              | 0.828571         | 0.757143         |
| Hepatocyte 11 | 0.757143         | 0.8              | 0.842857         | 0.871429         |
| Hepatocyte 12 | 0.742857         | 0.8              | 0.857143         | 0.8              |
| Hepatocyte 13 | 0.728571         | 0.8              | 0.871429         | 0.814286         |
| Hepatocyte 14 | 0.714286         | 0.8              | 0.885714         | 0.842857         |
| Hepatocyte 15 | 0.7              | 0.8              | 0.9              | 0.885714         |

**Table S6:**  $k_r$  and  $G_{ij}$  values were systematically varied across the sinusoid to obtain **Figure 5**. Variations in  $k_r$  in **Figure 5-A, B, and C** were as follows:

|               | <b>Figure 5A</b> | <b>Figure 5B</b> | <b>Figure 5C</b> |
|---------------|------------------|------------------|------------------|
|               | $k_r$            | $k_r$            | $k_r$            |
| Hepatocyte 1  | 0.5              | 2                | 2                |
| Hepatocyte 2  | 0.5              | 1.928571         | 1.888889         |
| Hepatocyte 3  | 0.5              | 1.857143         | 1.777778         |
| Hepatocyte 4  | 0.5              | 1.785714         | 1.666667         |
| Hepatocyte 5  | 0.5              | 1.714286         | 1.555556         |
| Hepatocyte 6  | 2                | 0.5              | 1.444444         |
| Hepatocyte 7  | 1.888889         | 0.5              | 1.333333         |
| Hepatocyte 8  | 1.777778         | 0.5              | 1.222222         |
| Hepatocyte 9  | 1.666667         | 0.5              | 1.111111         |
| Hepatocyte 10 | 1.555556         | 0.5              | 1                |
| Hepatocyte 11 | 1.444444         | 1.285714         | 0.5              |
| Hepatocyte 12 | 1.333333         | 1.214286         | 0.5              |
| Hepatocyte 13 | 1.222222         | 1.142857         | 0.5              |
| Hepatocyte 14 | 1.111111         | 1.071429         | 0.5              |
| Hepatocyte 15 | 1                | 1                | 0.5              |

While all  $G_{ij}$  values were equal to 0.9 for all hepatocytes pairs in case of  $Ca^{2+}$  signal propagation shown in Figure 5-A, B and C, column I, they were variable for columns II and III. For columns II and III,  $G_{ij}$  values were:

Figure 5A:  $G_{ij} = 2$  (column II) or 5 (column III) for  $\{i,j\} = \{1,2\}, \{2,1\}, \{2,3\}, \{3,2\}, \{3,4\}, \{4,3\}, \{4,5\}, \{5,4\}, \{5,6\}$ ;  $G_{ij} = 0.9$  otherwise

Figure 5B:  $G_{ij} = 2$  (column II) or 5 (column III) for  $\{i,j\} = \{5,6\}, \{6,5\}, \{6,7\}, \{7,6\}, \{7,8\}, \{8,7\}, \{8,9\}, \{9,10\}, \{10,9\}, \{10,11\}, \{11,10\}$ ;  $G_{ij} = 0.9$  otherwise

Figure 5C:  $G_{ij} = 2$  (column II) or 5 (column III) for  $\{i,j\} = \{10,11\}, \{11,10\}, \{11,12\}, \{12,11\}, \{12,13\}, \{13,12\}, \{13,14\}, \{14,13\}, \{14,15\}$ ;  $G_{ij} = 0.9$  otherwise

### **Supplement S7: MATLAB Code**

### **Supplement S8: SBML Model**

The SBML model was created using VCell<sup>[1]</sup> 5.3 (build 12).

### **References:**

[1]: Moraru, Ion I., et al. "Virtual Cell modelling and simulation software environment." IET systems biology 2.5 (2008): 352-362.
